# Supplementary material for: Specific antibody-induced fluorescence quenching for the development of a directly applicable and label-free immunoassay
Source: Royal Society of Chemistry journal article supplement (doi:10.1039/c4ay00954a), 2014-01-01
Supplement: c4ay00954a1.pdf [file c4ay00954a1.pdf]

## Electronic Supporting Information for

# Specific antibody-induced fluorescence quenching for direct and label-free immunosaaay

Xin Li<sup>a,b,c,&</sup>, Jiawen Lei<sup>a,b,c,&</sup>, Peiwu Li<sup>a,b,c,d,e,\*</sup>, Qi Zhang<sup>a,b,c,e,\*</sup>, Liangxiao Zhang<sup>a,b,c</sup>, Wen Zhang<sup>a,b,c</sup>,  
Zhaowei Zhang<sup>a,b,e</sup>

<sup>a</sup> Oil Crops Research Institute of the Chinese Academy of Agricultural Sciences, Wuhan 430062, PR. China

<sup>b</sup> Key Laboratory of Biology and Genetic Improvement of Oil Crops, Ministry of Agriculture, Wuhan 430062, PR. China

<sup>c</sup> Key laboratory of Detection for Mycotoxins, Ministry of Agriculture, Wuhan 430062, PR. China

<sup>d</sup> Laboratory of Risk Assessment for Oilseeds Products (Wuhan), Ministry of Agriculture, Wuhan 430062, PR. China

<sup>e</sup> Quality Inspection and Test Center for Oilseeds Products, Ministry of Agriculture, Wuhan 430062, PR. China

& These authors contributed equally to this study

\* Corresponding author. Tel: +86-27-86812943;

Fax: +86-27-86812862

E-mail

address:

peiwuli@oilcrops.cn

## Experimental Details & Methodology

**Material and Instrumentation.** All reagents were of analytical grade. Anti-Aflatoxin B<sub>1</sub> (AFB<sub>1</sub>) antibody 1C11, 3G1 and antibody 1H2 were produced in our laboratory. AFB<sub>1</sub>, bovine serum albumin (BSA), ovalbumin (OVA), rabbit anti-mouse polyclone antibody (product #: M7023) and alumina were purchased from Sigma (St. Louis, MO, USA). 2, 6-Di-O-methyl- $\beta$ -cyclodextrin was obtained from Yuanye Biotech Co. (Shanghai, China). The fluorescence spectrophotometer (F-4500) was purchased from Hitachi. The peanut samples were grinded with food processor, which was obtained from JOYOUNG Co. (JYL-C090, Shandong, China).

**Fluorescence scanning of AFB<sub>1</sub> standard.** The AFB<sub>1</sub> standard dissolved in methanol was stored in the concentration of 10  $\mu$ g/mL. Then, it was diluted with methanol-water to different concentrations, which the experiment needed. During the scanning of the fluorescence, the parameters of the fluorescence spectrophotometer were as follows: excitation light, 365nm, optical grating, 2.5 nm; transmitting light optical grating, 10 nm. During the following fluorescence measuring in the following experiment, the parameters were the same as these.

**Fluorescence Enhance.** The fluorescence enhancer 2, 6-Di-O-methyl- $\beta$ -cyclodextrin was employed to enhance the intrinsic fluorescence signal of AFB<sub>1</sub>. For each milliliter of AFB<sub>1</sub>, 500 $\mu$ L 0.01 M 2, 6-Di-O-methyl- $\beta$ -cyclodextrin was utilized. After adding this enhancer, the fluorescence signal of AFB<sub>1</sub> was scanned immediately.

**Immunoreaction between AFB<sub>1</sub> and antibodies and proteins.** After measured the fluorescence of the mixture of AFB<sub>1</sub> and fluorescence enhancer, the specific antibodies, non-specific antibodies or non-specific proteins dissolved in water were added into the mixture and shake up to enable them react with AFB<sub>1</sub>. Certain times later, the fluorescence of the product was measured and evaluated.

**Production of the alumina column.** This column was produced in our lab. Shell of the syringe (1 mL) was soaked in methanol overnight to eliminate the fluorescence effect of the shell. Then the solid alumina (1 mL) was added to fulfill the dried shell. This column was used to clean the peanut sample extraction.

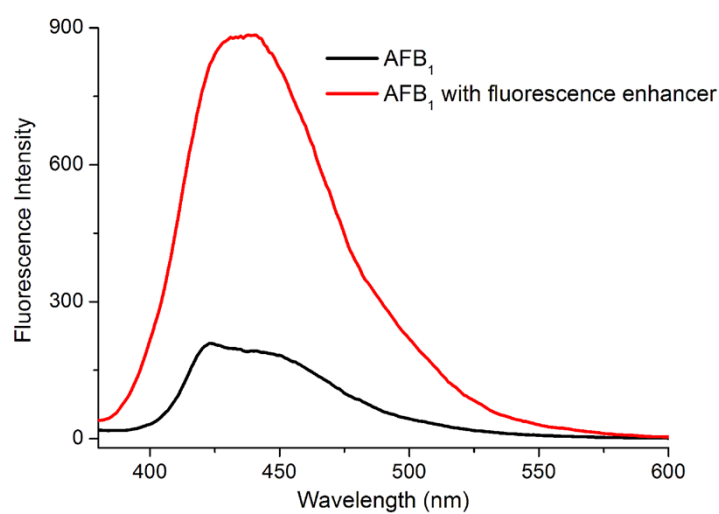

**Figure S1.** The fluorescence spectra comparison of AFB<sub>1</sub> and AFB<sub>1</sub> with the fluorescence enhancer. AFB<sub>1</sub> was of the concentration of 20 ng/mL dissolved in 10% methanol-water.

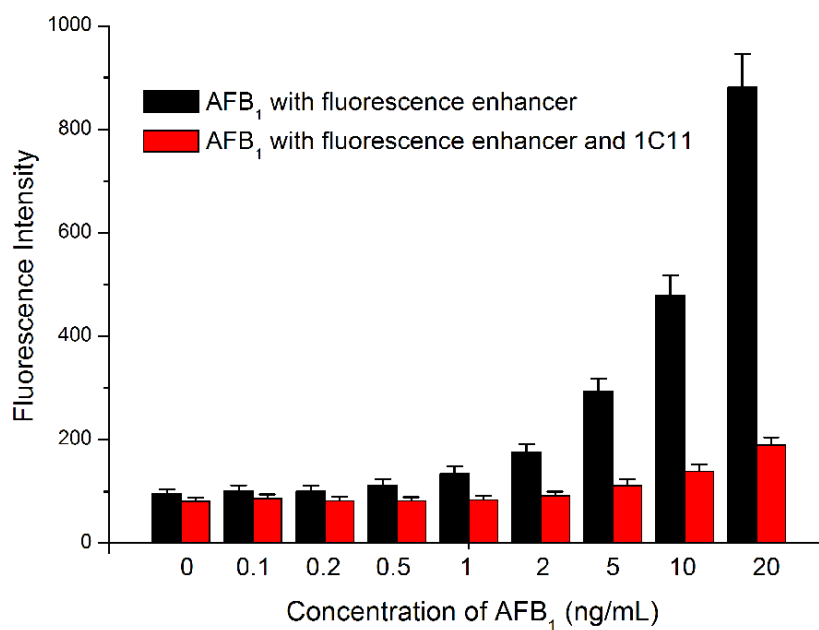

**Figure S2.** The fluorescence intensity value of serial concentrations of standard AFB<sub>1</sub> at 440 nm before and after the immuration with 1C11.

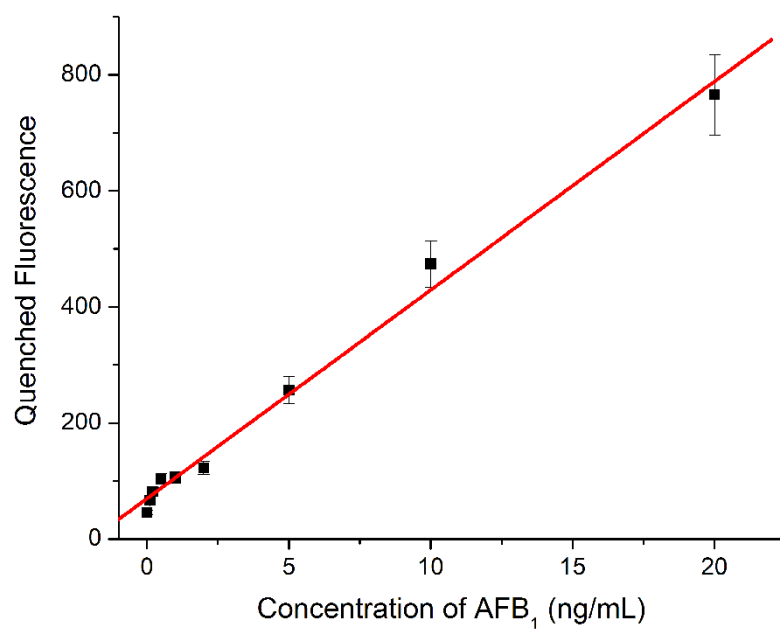

**Figure S3.** The standard curve of the quenched fluorescence intensity to different concentrations of AFB<sub>1</sub> in peanut sample matrix,  $y=35.95x+69.63$ ,  $r^2=0.9959$ .
